# Supplementary material for: Tank binding kinase 1 is a centrosome-associated kinase necessary for microtubule dynamics and mitosis
Source: PubMed Central journal article supplement (PMC4682058; doi:10.1038/ncomms10072), 2015-12-10
Supplement: ncomms10072-s1.pdf [file ncomms10072-s1.pdf]

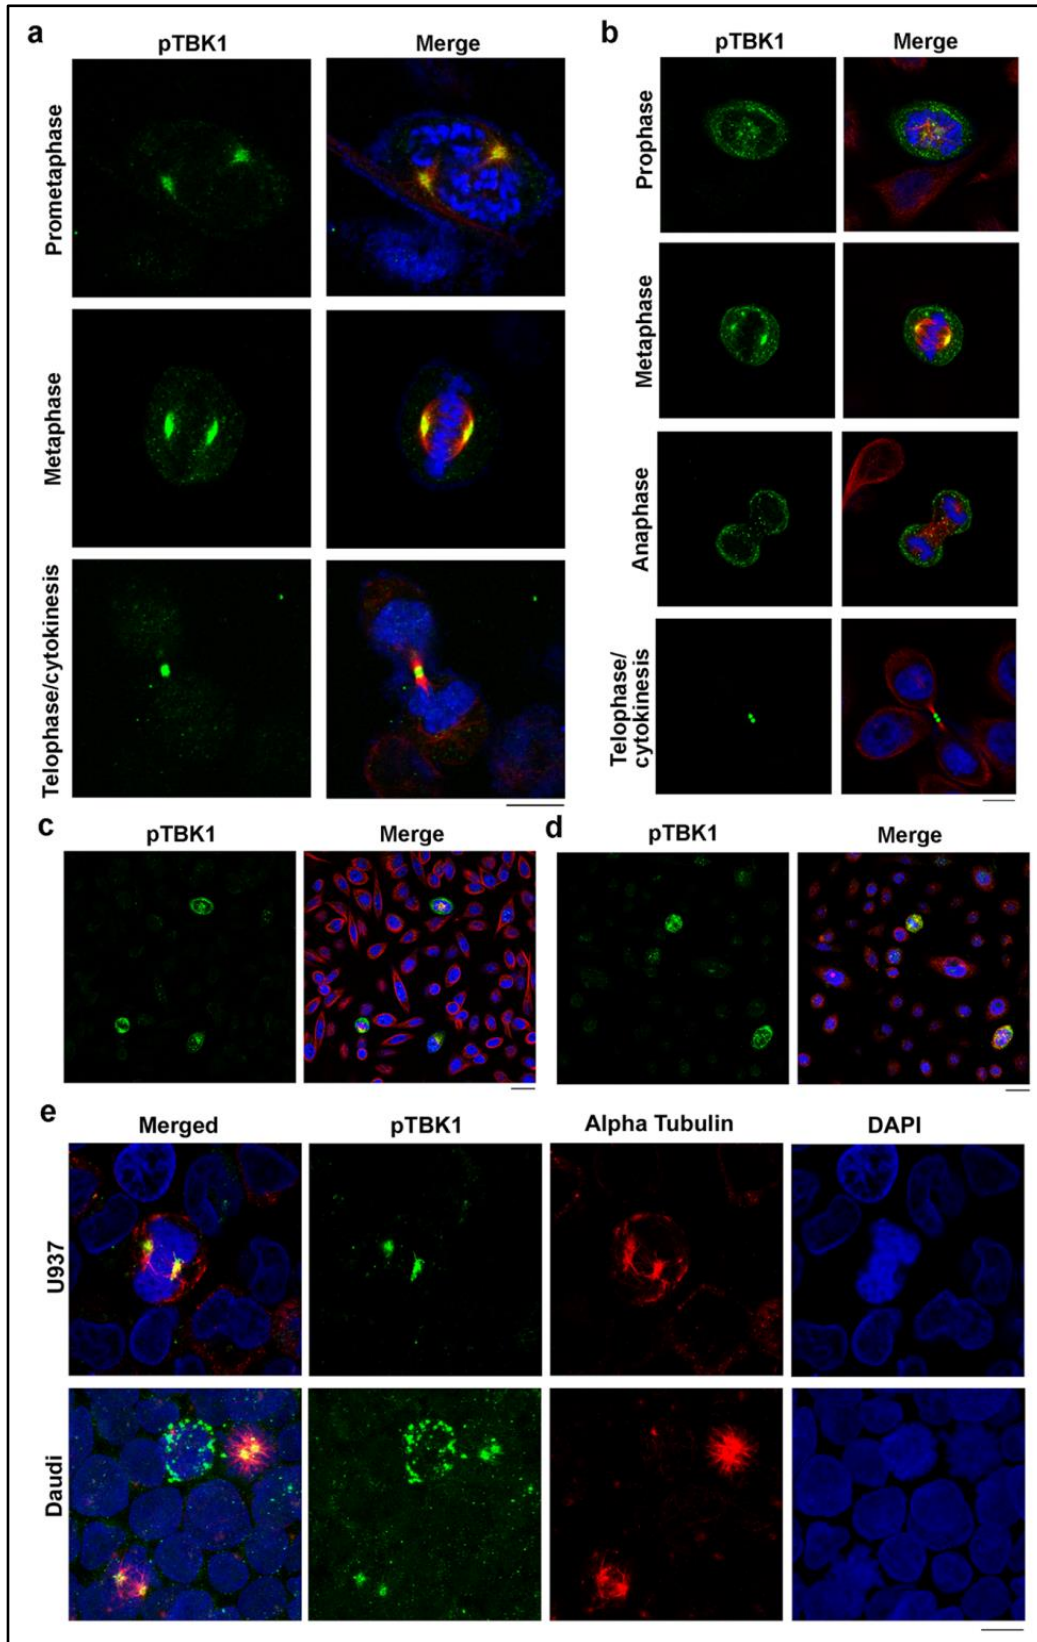

**Supplementary Figure 1. Phospho-TBK1 localizes to centrosomes and mitotic spindles non-small cell lung cancer cell lines as well as immune cells during mitosis.** (a) Confocal microscopy images of Calu-6 cells at prometaphase, metaphase and telophase/cytokinesis stained for phospho-TBK1 (green), alpha tubulin (red) and DNA (DAPI, blue), scale bar=10  $\mu$ m

(b) Confocal microscopy images of PC9 cells at prophase, metaphase, metaphase, telophase/cytokinesis and non-mitotic cells stained for phospho-TBK1 (green), alpha tubulin (red) and DNA (DAPI, blue), scale bar=10  $\mu$ m. (c) Confocal image taken at a lower magnification showing the levels of phospho-TBK1 in mitotic as well as non-mitotic PC9 cells stained for phospho-TBK1 and alpha tubulin scale bar=25  $\mu$ m. (d) AALE cells stained for phospho-TBK1 and CEP170 scale bar=25 $\mu$ m.

(e) U937 (histiocytic lymphoma cells) and Daudi (Burkitt's lymphoma; B lymphoblast) cells stained for phospho-TBK1 (green), alpha tubulin (red) and DNA (DAPI, blue), scale bar=10  $\mu$ m.

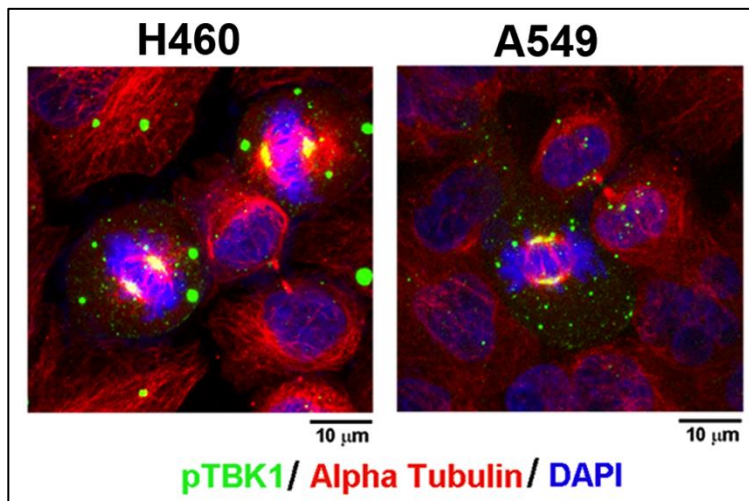

**Supplementary Figure 2. Centrosomal localization of phospho-TBK1 as detected by a second antibody**

Detection of pTBK1 by immunofluorescence using a second pTBK1 antibody from a different source (Origene) yielded similar results. Phospho-TBK1 (green), alpha tubulin (red) and DNA (DAPI, Blue). This experiment confirms that the centrosomal localization of phospho-TBK1 can be detected using multiple antibodies from different sources.

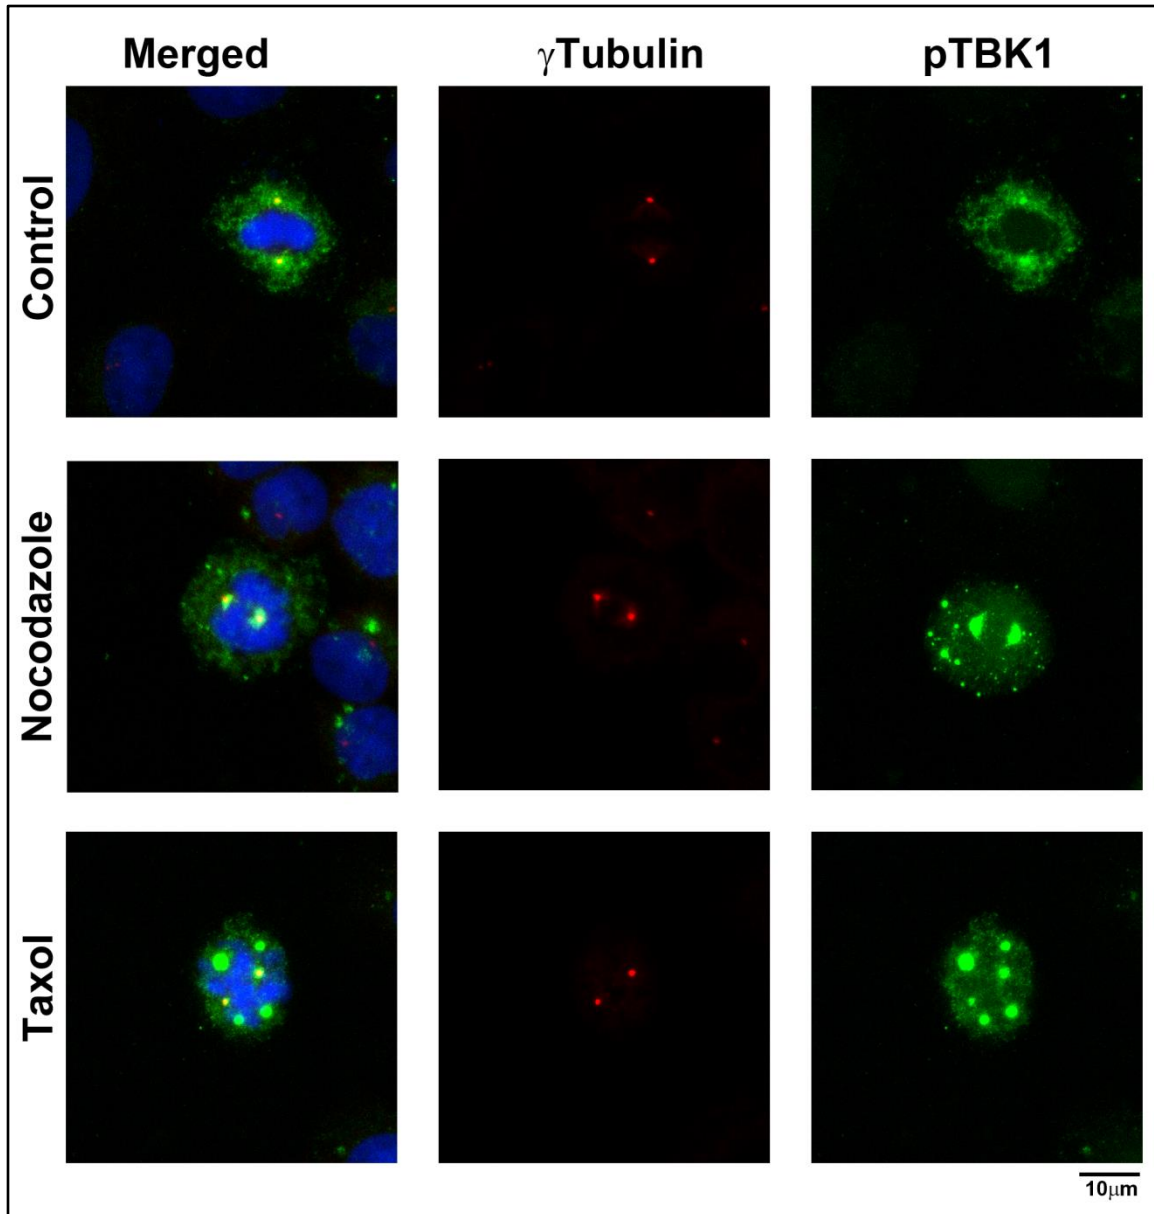

**Supplementary Figure 3. Centrosomal localization of TBK1 does not depend on microtubule integrity**

Confocal microscopy images of H460 cells treated with nocodazole or taxol demonstrating that pTBK1 localizes to centrosomes when MTs are hyperstabilized by taxol or depolymerized by nocodazole.

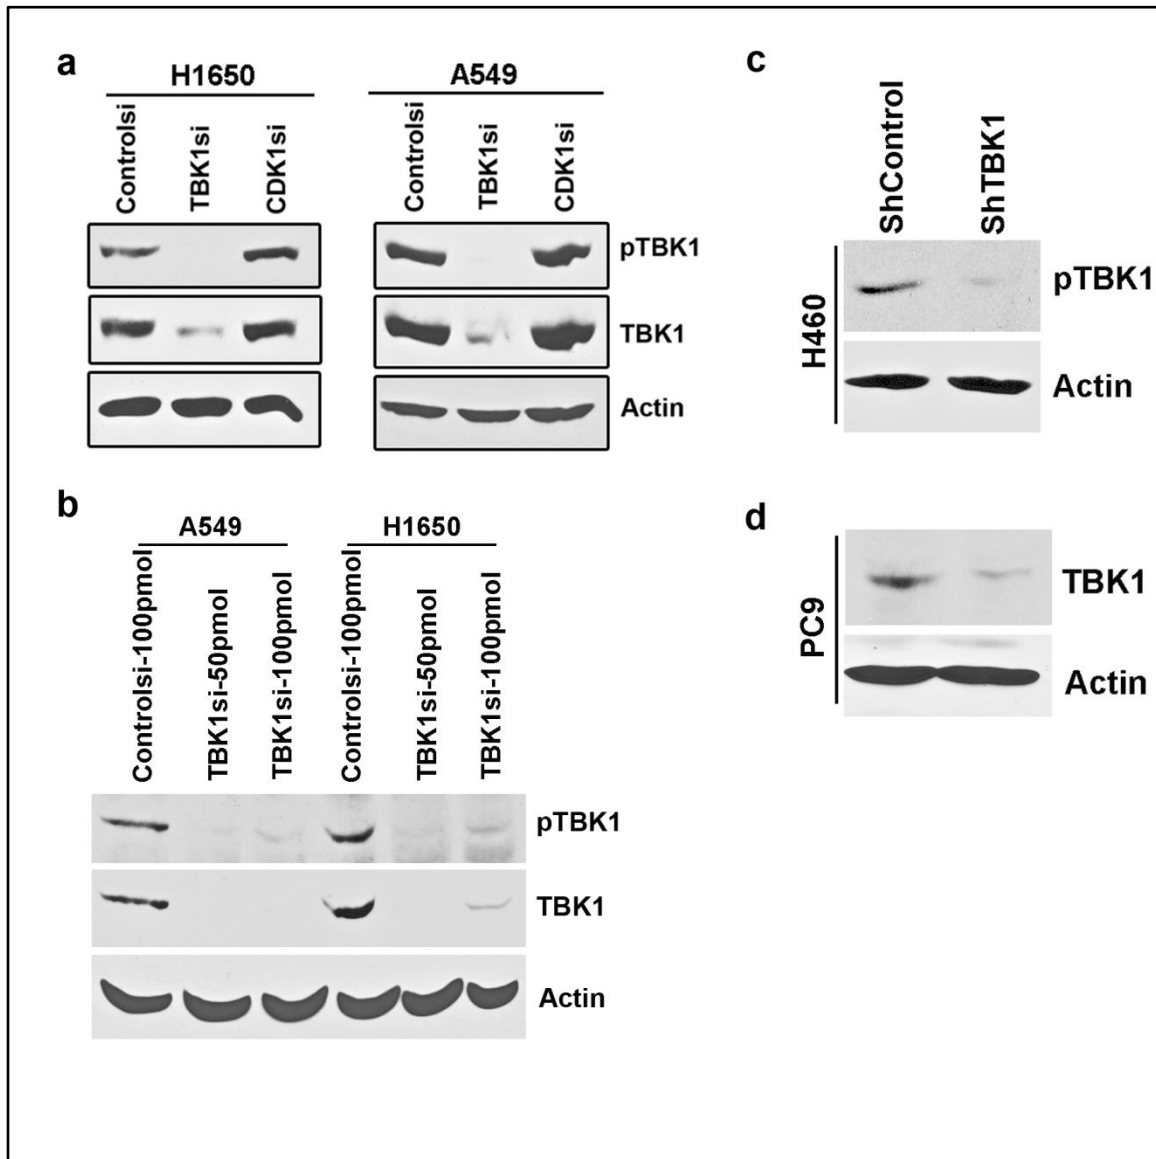

**Supplementary Figure 4. Depletion of TBK1 by siRNA and shRNA**

(a & b) Western blots showing the levels of phospho-TBK1, TBK1 and after transfection with two different siRNA sequence targeting TBK1 (a) siRNA from SantaCruz (b) siRNA from Ambion. (c & d), Western blots showing the depletion of TBK1 after transducing with shTBK1 lentiviral construct in H460 and PC9.

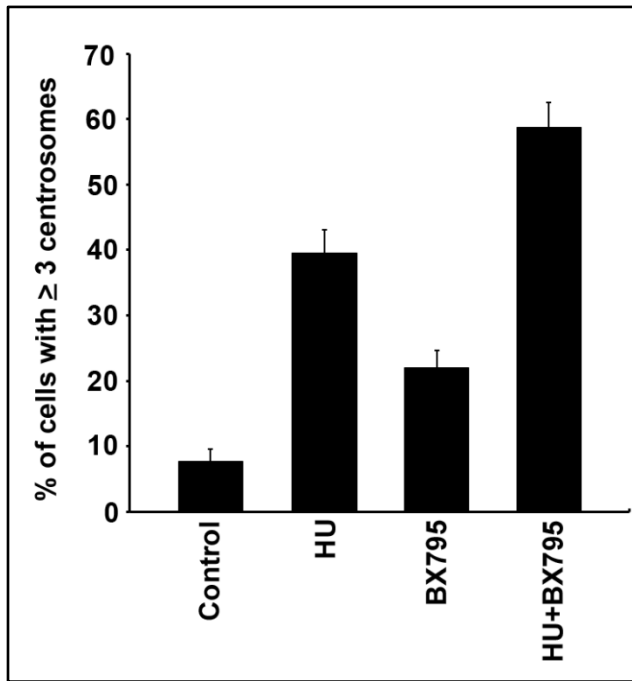

**Supplementary Figure 5. TBK1 inhibition increases number of centrosomes**

TBK1 inhibition in hydroxyurea (HU) treated U2OS cells using BX795 induced centrosome amplification. TBK1 inhibition alone was sufficient to induce centrosome amplification in 22% of cells; the possibility exists that this is due to incomplete cell division.

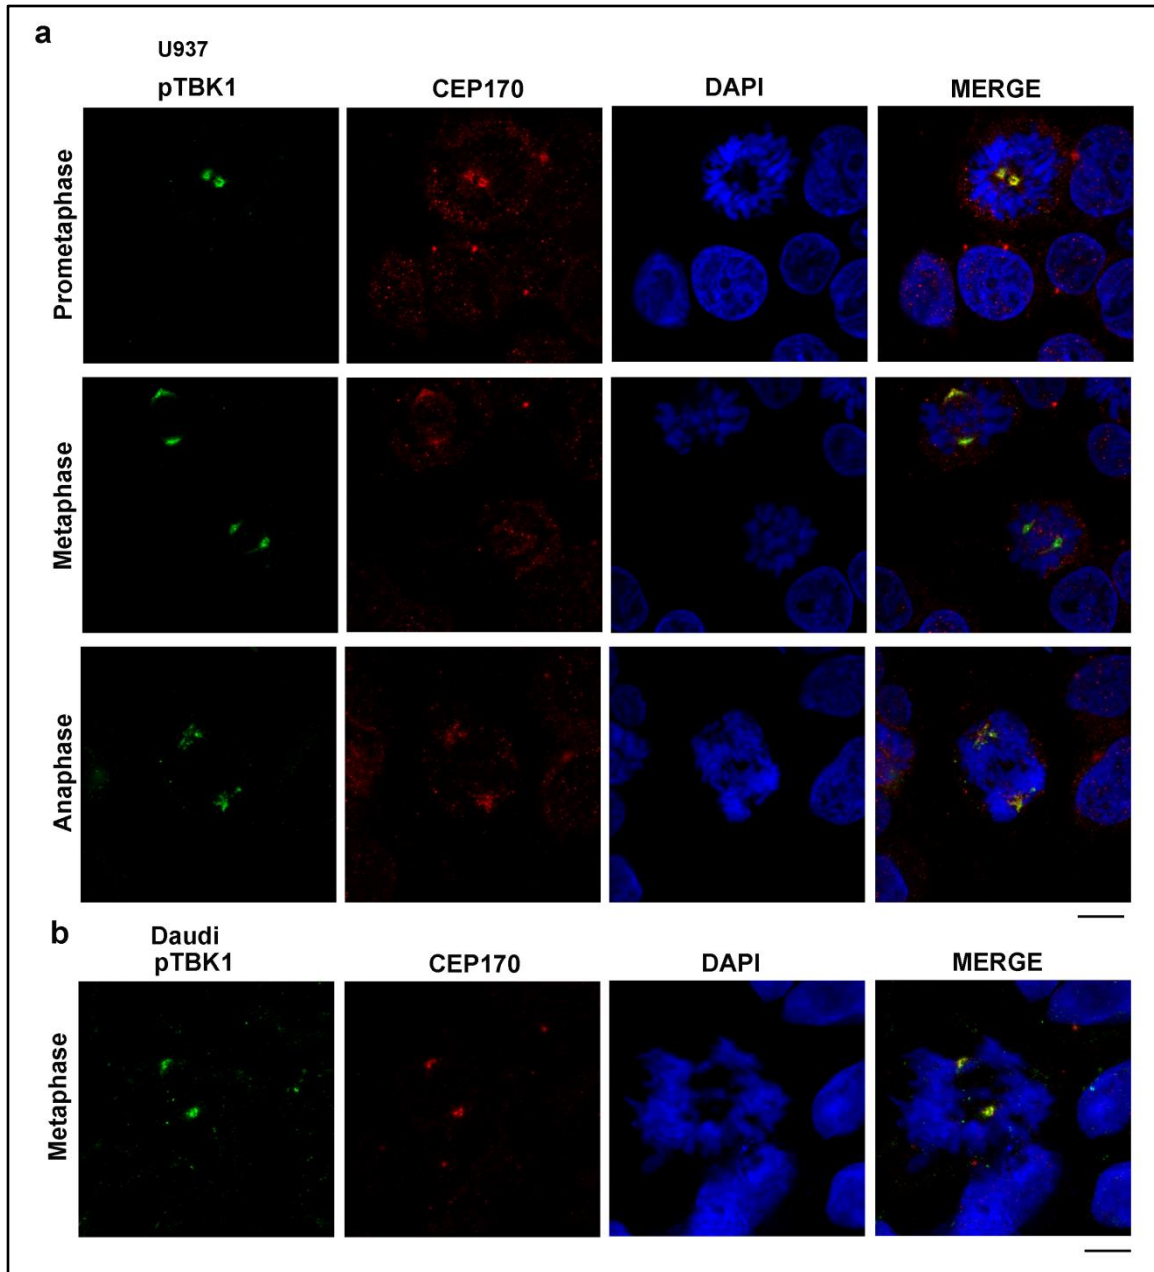

**Supplementary Figure 6. Colocalization of phospho-TBK1 with CEP170 in immune cells.**

(a,b) Confocal image showing the co-localization of phospho-TBK1 (green) and CEP170 (red) in U937 (histiocytic lymphoma cells) and Daudi (Burkitt's lymphoma; B lymphoblast) cells. Scale bar=10  $\mu$ m.

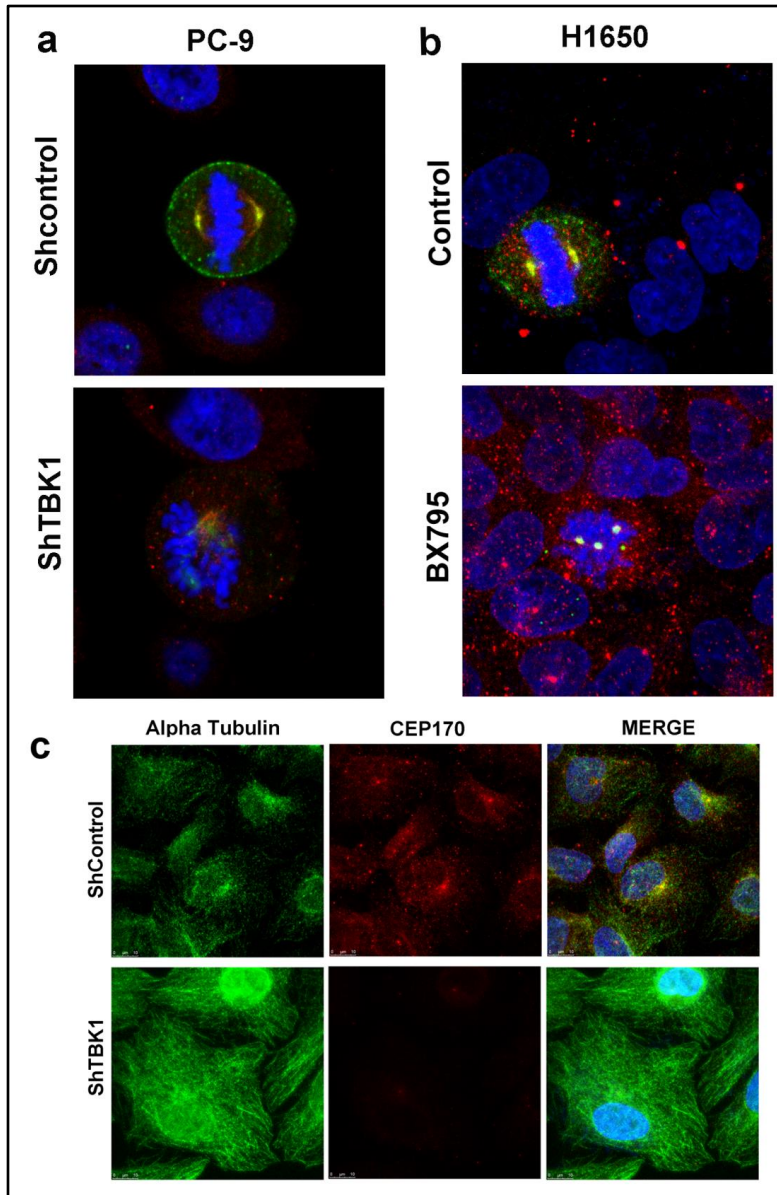

**Supplementary Figure 7. Inhibition of TBK1 results in mitotic defects.**

(a, b) Mitotic defects observed after depletion of TBK1 in PC9 (a) and inhibition of TBK1 by BX795 in H1650 (b). phospho-TBK1 (green), CEP170 (red) and DAPI (blue). Scale bar=10  $\mu$ m. (c) Depletion of TBK1 results in inhibition of CEP170 localization to the centrosomes in non-mitotic cells. Microtubules are visualized by staining for Alpha Tubulin (green), CEP170 (red) DNA (DAPI, Blue).



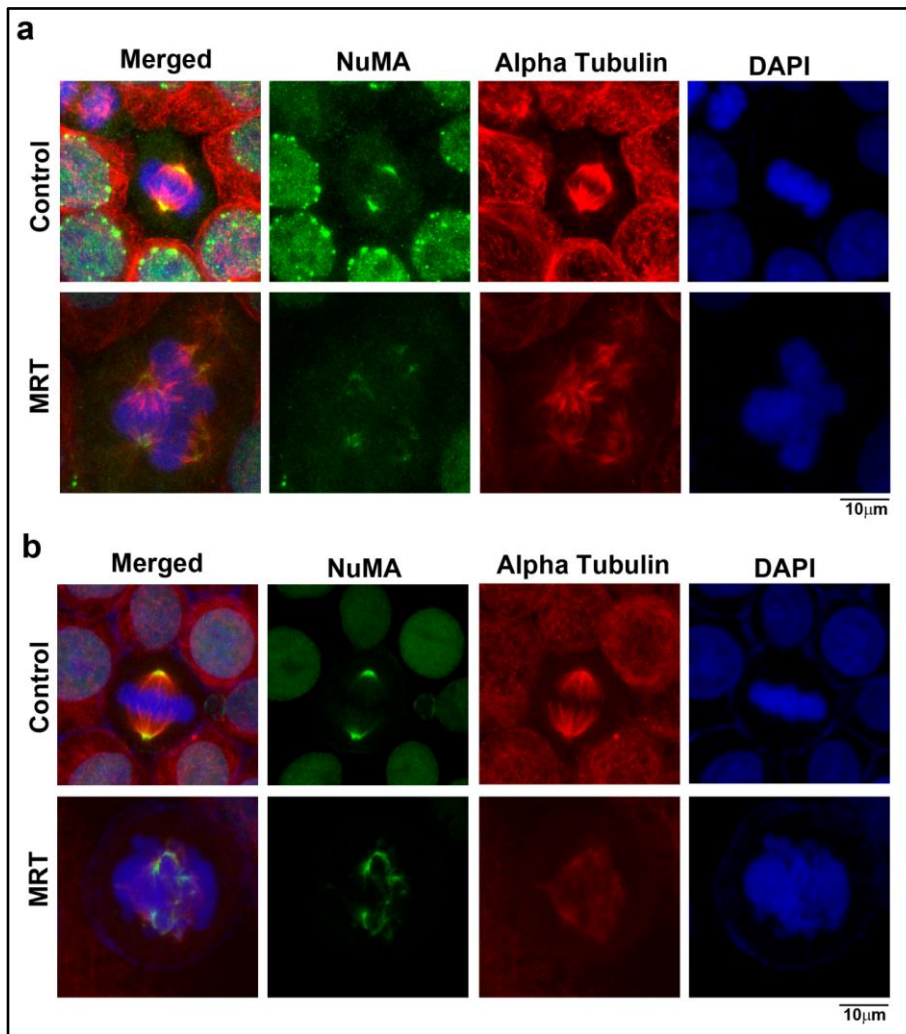

**Supplementary Figure 8. TBK1 inhibition affects spindle pole localization of NuMA.**

Inhibition of TBK1 by 2  $\mu$ M MRT affected spindle pole localization of NuMA. H460 (a) and HeLa (b) cells were stained for NuMA (green), Alpha Tubulin (red), DAPI (Blue). Scale bar 10  $\mu$ m.

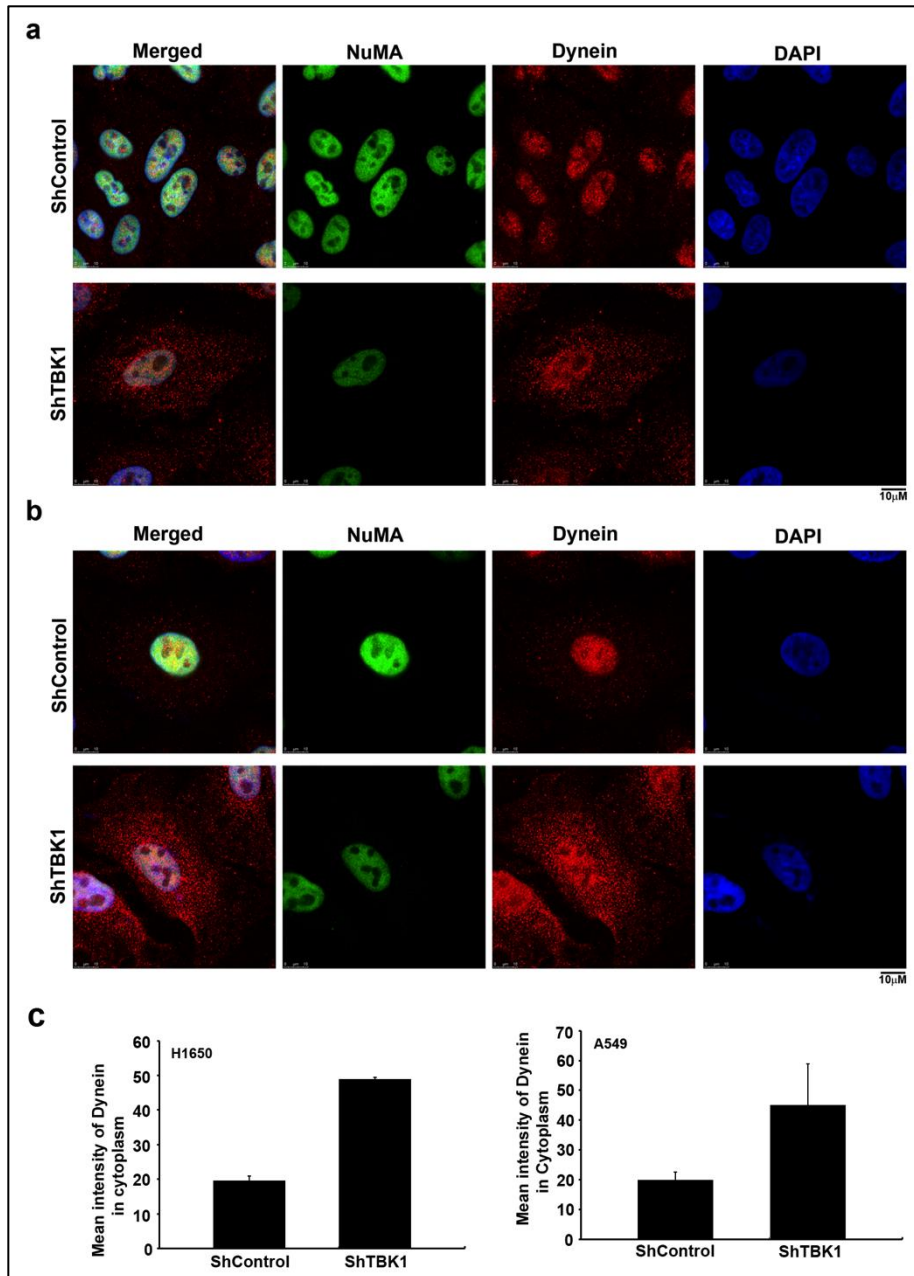

**Supplementary Figure 9. TBK1 depletion affects dynein levels in cytoplasm.**

Immunofluorescence staining for Dynein intermediate chain (red) and NuMA (green) in shcontrol and shTBK1 transfected H1650 (a) and A549 (b) cells. Scale bar 10  $\mu$ m. (c) Quantification of signal from immunofluorescence images showing alteration in Dynein intermediate chain levels in the cytoplasm after depletion of TBK1.

## Supplementary Figure 10. Uncropped images of western blots and gels.

The full scans of the important western blots and gels used in Figures 1, 2, 5, 6, 7 and 8

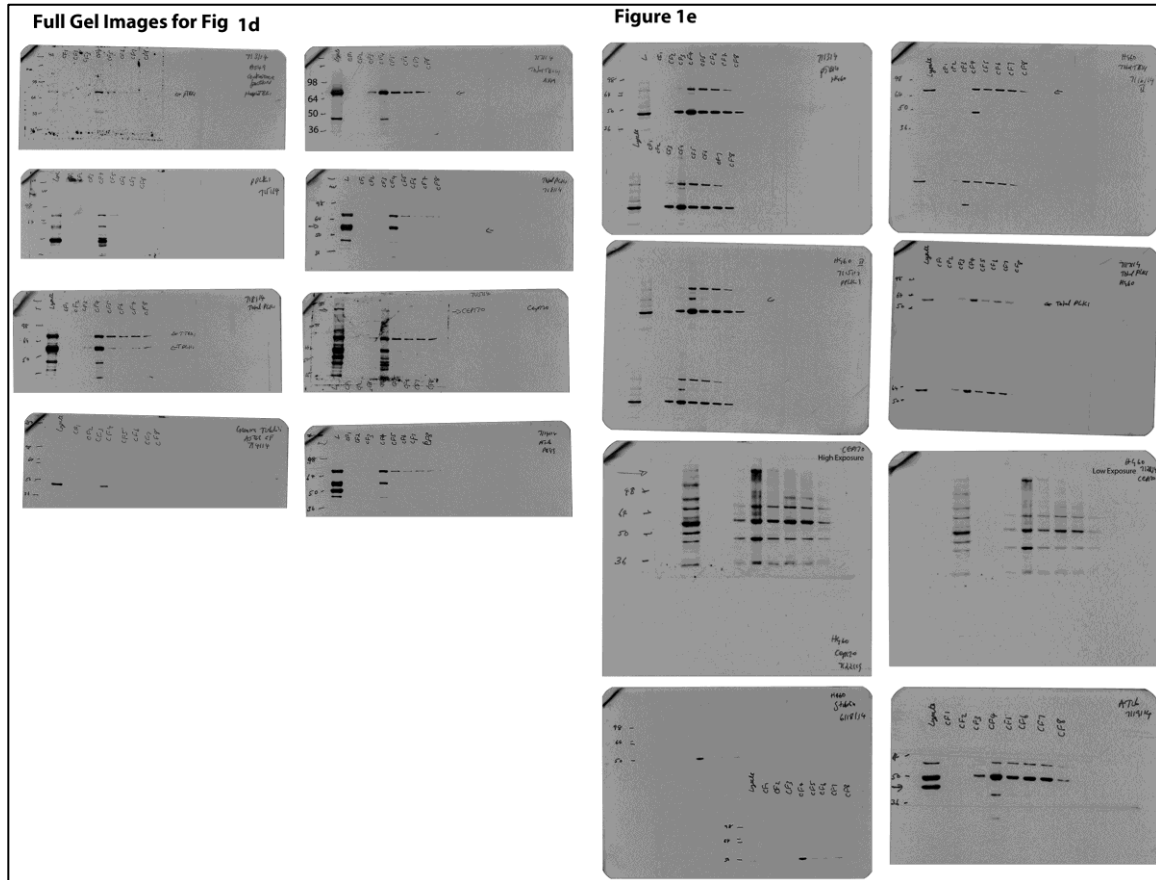



5b

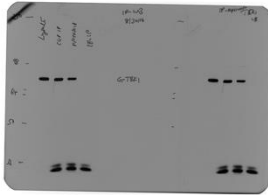

5c

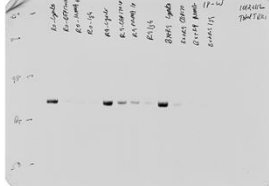

5d

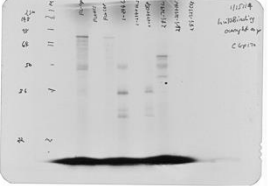

5e

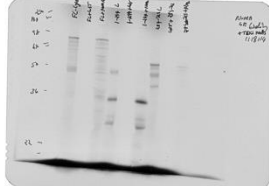

5f

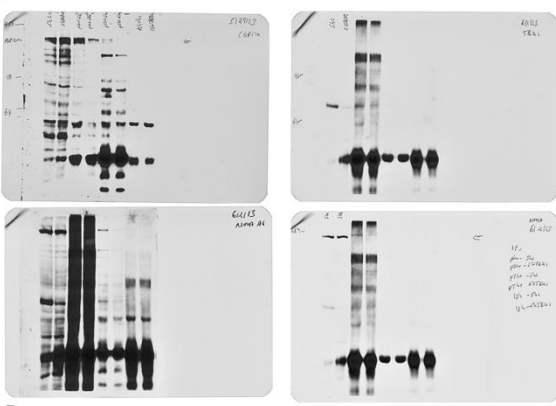

5g

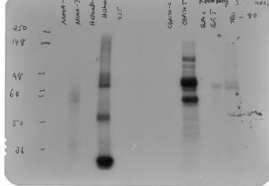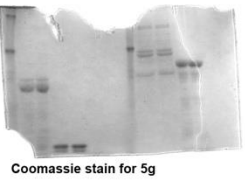

6f

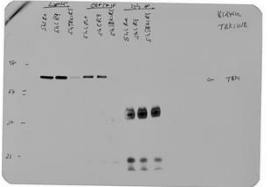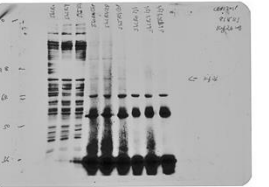

6h

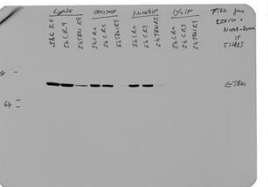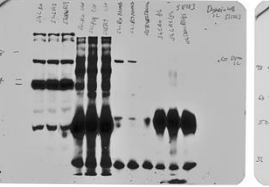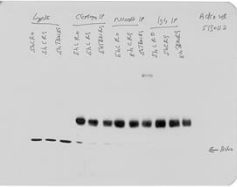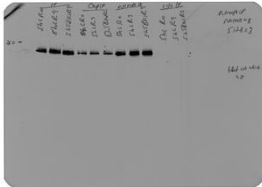

7a

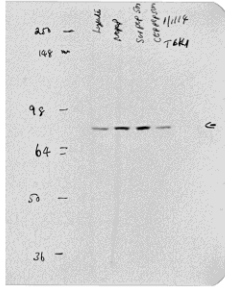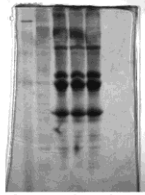

Coomassie stain

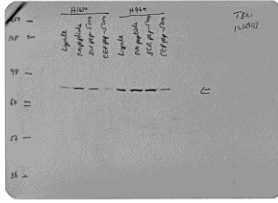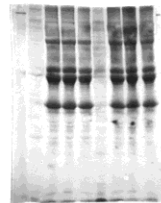

Coomassie stain

7b

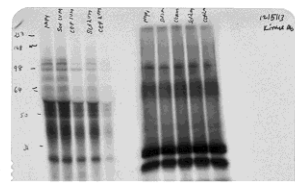

7c

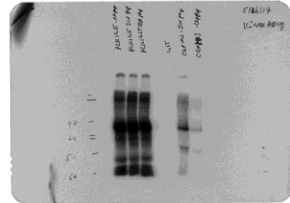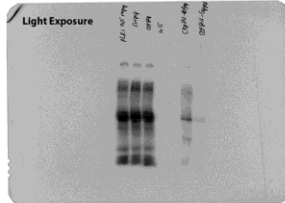

7d

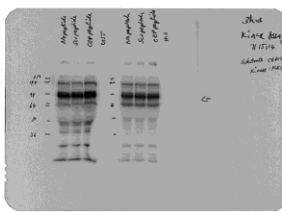

8c

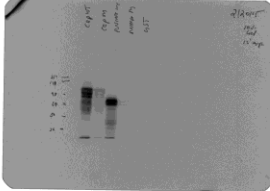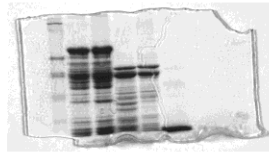

Coomassie stain

8d

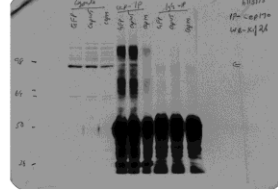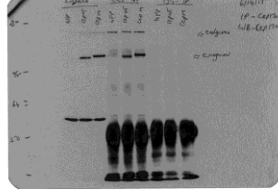

8e

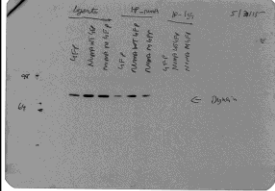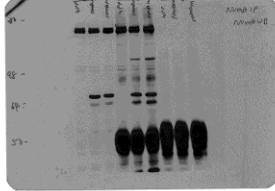

**Supplementary Table 1**

| Peptide                                                     | Probability (%) | Start-Stop |
|-------------------------------------------------------------|-----------------|------------|
| QTSSTP <b>SS</b> LALTSASR                                   | 95              | 859-874    |
| ERSE <b>S</b> LDPDSSMDT <b>T</b> LILK                       | 95              | 877-895    |
| DNS <b>S</b> PE <b>S</b> DVDTA <b>S</b> T <b>S</b> LVTGETER | 95              | 926-950    |
| LGEASDSELADADKA <b>S</b> VASEVSTTS                          | 95              | 1108-1141  |
| LQSAGSAMPT <b>SS</b> SFK                                    | 95              | 1268-1282  |
| VFDE <b>S</b> LNFR                                          | 95              | 1358-1366  |
| ALHPAAVSAAAEFENA <b>S</b> EAD <b>F</b> SIHFNR               | 95              | 1543-1570  |

**Phosphorylated residues on CEP170 identified by mass spectrometry.**

Phosphorylated Serine is indicated as '**S**'  
Phosphorylated Threonine is indicated as '**T**'

For identifying CEP170 amino acid residues phosphorylated by TBK1, *in vitro* kinase assays were performed with purified His tagged CEP170 in the presence of TBK1. *In vitro* kinase reaction without TBK1 was performed as the negative control and the residues phosphorylated specifically in the presence of TBK1 were identified by mass spectrometry.

**Supplementary Table 2**

| <b>Peptide</b>                          | <b>Probability (%)</b> | <b>Start-Stop</b> |
|-----------------------------------------|------------------------|-------------------|
| EPQAKPQLDLSIDSLDL <b>S</b> CEEGTPLSITSK | 100                    | 1711-1740         |
| LPPKVESLE <b>S</b> LYFTPIPAR            | 100                    | 1763-1781         |
| LGSPDYGNSALL <b>S</b> LPGYRPTR          | 95                     | 1860-1881         |
| R <b>S</b> MQPIQIAEGTGITTR              | 100                    | 1967-1984         |
| KLG <b>S</b> LLR                        | 99                     | 2058-2065         |

**Phosphorylated residues on NuMA identified by mass spectrometry**

For identifying NuMA amino acid residues phosphorylated by TBK1, *in vitro* kinase assays were performed with purified GST tagged NuMA in the presence of TBK1. *In vitro* kinase reaction without TBK1 was performed as the negative control and the residues phosphorylated specifically in the presence of TBK1 were identified by mass spectrometry. Phosphorylated Serine is indicated as '**S**'
